# Supplementary material for: Mycobiota of Mexican Maize Landraces with Auxin-Producing Yeasts That Improve Plant Growth and Root Development
Source: MDPI journal article supplement (doi:10.3390/plants12061328), 2023-03-15
Supplement: s1 [file s1]

Supplementary table S1. Yeast strains isolated from red and blue corn plants and their plant growth-promoting characteristics\*

| Strain | GenBank ID | Maize variety | Plant Sample | Molecular identification                     | Siderophore production <sup>n1</sup> (% siderophore units) | Auxin Production <sup>n2</sup> (µg/mL) | Phosphate Solubilization <sup>n3</sup> (solubilization index) | Pectinase production <sup>n4</sup> (enzymatic index) | Cellulase production <sup>n5</sup> (enzymatic index) | Protease production <sup>n6</sup> (enzymatic index) | Amylase production <sup>n7</sup> (enzymatic index) |
|--------|------------|---------------|--------------|----------------------------------------------|------------------------------------------------------------|----------------------------------------|---------------------------------------------------------------|------------------------------------------------------|------------------------------------------------------|-----------------------------------------------------|----------------------------------------------------|
| Ry1    | MN299236   | Red           | Cob          | <i>Rhodotorula mucilaginosa</i>              | ND                                                         | ND                                     | 2.0±0c                                                        | ND                                                   | ND                                                   | ND                                                  | ND                                                 |
| Ry2    | MN299256   | Red           | Cob          | <i>Clavispora lusitaniae</i>                 | ND                                                         | ND                                     | 2.0±0c                                                        | ND                                                   | ND                                                   | ND                                                  | ND                                                 |
| Ry3    | MN299237   | Red           | Cob          | <i>Rhodotorula mucilaginosa</i>              | ND                                                         | ND                                     | 2.0±0c                                                        | ND                                                   | ND                                                   | ND                                                  | ND                                                 |
| Ry4    | MN299230   | Red           | Cob          | <i>Suhyomyces prunicola</i>                  | ND                                                         | ND                                     | 3.0±0d                                                        | ND                                                   | ND                                                   | ND                                                  | ND                                                 |
| Ry5    | MN299257   | Red           | Cob          | <i>Clavispora lusitaniae</i>                 | ND                                                         | ND                                     | ND                                                            | ND                                                   | ND                                                   | ND                                                  | ND                                                 |
| Ry6-2  | MN299222   | Red           | Cob          | <i>Candida oleophila/Candida railenensis</i> | ND                                                         | ND                                     | 1.5±0b                                                        | ND                                                   | ND                                                   | ND                                                  | ND                                                 |
| Ry7    | MN299234   | Red           | Cob          | <i>Rhodotorula mucilaginosa</i>              | ND                                                         | ND                                     | ND                                                            | ND                                                   | ND                                                   | ND                                                  | ND                                                 |
| Ry8    | MN299235   | Red           | Cob          | <i>Rhodotorula mucilaginosa</i>              | ND                                                         | ND                                     | ND                                                            | ND                                                   | ND                                                   | ND                                                  | ND                                                 |
| Ry9    | MN299258   | Red           | Phyllosphere | <i>Clavispora lusitaniae</i>                 | ND                                                         | ND                                     | ND                                                            | ND                                                   | ND                                                   | ND                                                  | ND                                                 |
| Ry11   | MN299228   | Red           | Phyllosphere | <i>Kurtzmaniella quercitrusa</i>             | ND                                                         | ND                                     | 2.1±0c                                                        | ND                                                   | ND                                                   | ND                                                  | ND                                                 |
| Ry13   | MN299259   | Red           | Phyllosphere | <i>Clavispora lusitaniae</i>                 | ND                                                         | ND                                     | 1.1±0a                                                        | ND                                                   | ND                                                   | ND                                                  | ND                                                 |
| Ry14   | MN299260   | Red           | Phyllosphere | <i>Clavispora lusitaniae</i>                 | ND                                                         | ND                                     | 1.1±0a                                                        | ND                                                   | ND                                                   | ND                                                  | ND                                                 |
| Ry14-2 | MN299261   | Red           | Phyllosphere | <i>Clavispora lusitaniae</i>                 | ND                                                         | ND                                     | ND                                                            | ND                                                   | ND                                                   | ND                                                  | ND                                                 |
| Ry15   | MN299262   | Red           | Phyllosphere | <i>Clavispora lusitaniae</i>                 | ND                                                         | ND                                     | ND                                                            | ND                                                   | ND                                                   | ND                                                  | ND                                                 |
| Ry16   | MN299263   | Red           | Phyllosphere | <i>Clavispora lusitaniae</i>                 | ND                                                         | ND                                     | ND                                                            | ND                                                   | ND                                                   | ND                                                  | ND                                                 |

|      |          |     |                 |                                               |    |    |        |        |       |    |    |
|------|----------|-----|-----------------|-----------------------------------------------|----|----|--------|--------|-------|----|----|
| Ry17 | MN299264 | Red | Phyllosphere    | <i>Clavispora lusitaniae</i>                  | ND | ND | ND     | ND     | ND    | ND | ND |
| Ry18 | MN299265 | Red | Phyllosphere    | <i>Clavispora lusitaniae</i>                  | ND | ND | ND     | ND     | ND    | ND | ND |
| Ry19 | MN299229 | Red | Phyllosphere    | <i>Holtermanniella takashimae</i>             | ND | ND | ND     | ND     | ND    | ND | ND |
| Ry20 | MN299266 | Red | Phyllosphere    | <i>Clavispora lusitaniae</i>                  | ND | ND | ND     | ND     | ND    | ND | ND |
| Ry21 | MN299267 | Red | Phyllosphere    | <i>Clavispora lusitaniae</i>                  | ND | ND | ND     | ND     | ND    | ND | ND |
| Ry22 | MN299268 | Red | Leaf endosphere | <i>Clavispora lusitaniae</i>                  | ND | ND | ND     | ND     | ND    | ND | ND |
| Ry23 | MN299238 | Red | Root endosphere | <i>Rhodotorula mucilaginosa</i>               | ND | ND | ND     | ND     | ND    | ND | ND |
| Ry24 | MN299221 | Red | Root endosphere | <i>Candida oleophila/Candida railenensis</i>  | ND | ND | 1.2±0a | ND     | ND    | ND | ND |
| Ry25 | MN299233 | Red | Root endosphere | <i>Rhodotorula mucilaginosa</i>               | ND | ND | ND     | ND     | ND    | ND | ND |
| Ry26 | MN299223 | Red | Root endosphere | <i>Candida oleophila/ Candida railenensis</i> | ND | ND | 1.2±0a | ND     | 1.1±0 | ND | ND |
| Ry27 | MN299239 | Red | Root endosphere | <i>Rhodotorula mucilaginosa</i>               | ND | ND | 1.5±0b | ND     | ND    | ND | ND |
| Ry29 | MN299255 | Red | Root endosphere | <i>Solicoccozyma</i> sp.                      | ND | ND | ND     | ND     | ND    | ND | ND |
| Ry30 | MN299269 | Red | Root endosphere | <i>Clavispora lusitaniae</i>                  | ND | ND | ND     | 1.1±0a | ND    | ND | ND |

|      |          |      |                 |                                 |    |          |        |    |       |    |    |
|------|----------|------|-----------------|---------------------------------|----|----------|--------|----|-------|----|----|
| Ry31 | MN299254 | Red  | Root endosphere | <i>Solicoccozyma</i> sp.        | ND | 9.3±2.4b | ND     | ND | ND    | ND | ND |
| Ry32 | MN299289 | Red  | Root endosphere | <i>Papiliotrema flavescens</i>  | ND | ND       | ND     | ND | 1.1±0 | ND | ND |
| Ry33 | MN299232 | Red  | Root endosphere | <i>Rhodotorula mucilaginosa</i> | ND | ND       | ND     | ND | ND    | ND | ND |
| Ry34 | MN299240 | Red  | Root endosphere | <i>Rhodotorula mucilaginosa</i> | ND | ND       | ND     | ND | ND    | ND | ND |
| Ry35 | MN299241 | Red  | Root endosphere | <i>Rhodotorula mucilaginosa</i> | ND | ND       | ND     | ND | ND    | ND | ND |
| Ry37 | MN299242 | Red  | Root endosphere | <i>Rhodotorula mucilaginosa</i> | ND | ND       | ND     | ND | ND    | ND | ND |
| Ry39 | MN299243 | Red  | Root endosphere | <i>Rhodotorula mucilaginosa</i> | ND | ND       | ND     | ND | ND    | ND | ND |
| Ry40 | MN299270 | Red  | Root endosphere | <i>Clavispora lusitaniae</i>    | ND | ND       | ND     | ND | ND    | ND | ND |
| Ry41 | MN299231 | Red  | Cob             | <i>Suhomyces prunicola</i>      | ND | ND       | ND     | ND | ND    | ND | ND |
| Y2   | MN299290 | Blue | Phyllosphere    | <i>Papiliotrema flavescens</i>  | ND | ND       | 1.7±0b | ND | ND    | ND | ND |
| Y3   | MN299271 | Blue | Phyllosphere    | <i>Clavispora lusitaniae</i>    | ND | ND       | ND     | ND | ND    | ND | ND |
| Y4   | MN299272 | Blue | Phyllosphere    | <i>Clavispora lusitaniae</i>    | ND | ND       | ND     | ND | ND    | ND | ND |
| Y5   | MN299298 | Blue | Phyllosphere    | <i>Papiliotrema flavescens</i>  | ND | ND       | ND     | ND | ND    | ND | ND |
| Y7   | MN299273 | Blue | Phyllosphere    | <i>Clavispora lusitaniae</i>    | ND | ND       | ND     | ND | ND    | ND | ND |

|     |          |      |              |                                              |        |          |        |        |    |    |    |
|-----|----------|------|--------------|----------------------------------------------|--------|----------|--------|--------|----|----|----|
| Y9  | MN299274 | Blue | Phyllosphere | <i>Clavispora lusitaniae</i>                 | ND     | ND       | ND     | ND     | ND | ND | ND |
| Y10 | MN299275 | Blue | Phyllosphere | <i>Clavispora lusitaniae</i>                 | ND     | ND       | ND     | ND     | ND | ND | ND |
| Y11 | MN299292 | Blue | Phyllosphere | <i>Clavispora lusitaniae</i>                 | ND     | 4±0.3d   | ND     | ND     | ND | ND | ND |
| Y12 | MN299301 | Blue | Phyllosphere | <i>Saitozyma paraflava</i>                   | ND     | ND       | ND     | ND     | ND | ND | ND |
| Y14 | MN299276 | Blue | Phyllosphere | <i>Clavispora lusitaniae</i>                 | ND     | ND       | ND     | ND     | ND | ND | ND |
| Y16 | MN299224 | Blue | Phyllosphere | <i>Candida oleophila/Candida railenensis</i> | ND     | ND       | ND     | ND     | ND | ND | ND |
| Y17 | MN299225 | Blue | Phyllosphere | <i>Candida oleophila/Candida railenensis</i> | ND     | ND       | ND     | ND     | ND | ND | ND |
| Y19 | MN299302 | Blue | Phyllosphere | <i>Naganishia</i> sp.                        | ND     | ND       | ND     | 4.0±0d | ND | ND | ND |
| Y20 | MN299293 | Blue | Phyllosphere | <i>Candida oleophila/Candida railenensis</i> | ND     | ND       | ND     | ND     | ND | ND | ND |
| Y21 | MN299294 | Blue | Phyllosphere | <i>Papiliotrema flavescens</i>               | ND     | ND       | ND     | ND     | ND | ND | ND |
| Y22 | MN299277 | Blue | Phyllosphere | <i>Clavispora lusitaniae</i>                 | ND     | ND       | ND     | ND     | ND | ND | ND |
| Y23 | MN299247 | Blue | Phyllosphere | <i>Rhodotorula glutinis</i>                  | ND     | 7.1±0.1c | ND     | ND     | ND | ND | ND |
| Y24 | MN299244 | Blue | Phyllosphere | <i>Rhodotorula mucilaginosa</i>              | ND     | ND       | ND     | ND     | ND | ND | ND |
| Y27 | MN299295 | Blue | Phyllosphere | <i>Papiliotrema flavescens</i>               | 87±4 a | ND       | ND     | ND     | ND | ND | ND |
| Y30 | MN299226 | Blue | Phyllosphere | <i>Candida oleophila/Candida railenensis</i> | ND     | ND       | ND     | ND     | ND | ND | ND |
| Y31 | MN299278 | Blue | Phyllosphere | <i>Clavispora lusitaniae</i>                 | ND     | ND       | 1.0±0a | ND     | ND | ND | ND |
| Y32 | MN299296 | Blue | Phyllosphere | <i>Papiliotrema flavescens</i>               | ND     | ND       | ND     | ND     | ND | ND | ND |

|     |          |      |                 |                                              |        |           |        |        |        |        |    |
|-----|----------|------|-----------------|----------------------------------------------|--------|-----------|--------|--------|--------|--------|----|
| Y33 | MN299279 | Blue | Phyllosphere    | <i>Clavispora lusitaniae</i>                 | ND     | ND        | ND     | ND     | ND     | ND     | ND |
| Y35 | MN299245 | Blue | Leaf endosphere | <i>Rhodotorula mucilaginosa</i>              | ND     | ND        | ND     | ND     | ND     | ND     | ND |
| Y40 | MN299227 | Blue | Leaf endosphere | <i>Candida oleophila/Candida railenensis</i> | ND     | ND        | ND     | ND     | ND     | ND     | ND |
| Y41 | MN299248 | Blue | Leaf endosphere | <i>Rhodotorula glutinis</i>                  | 57±3 b | ND        | ND     | ND     | 1.5±0a | 3.0±0c | ND |
| Y42 | MN299297 | Blue | Leaf endosphere | <i>Papiliotrema flavescens</i>               | ND     | ND        | 1.0±0a | ND     | ND     | ND     | ND |
| Y43 | MN299249 | Blue | Leaf endosphere | <i>Rhodotorula glutinis</i>                  | ND     | ND        | ND     | ND     | 1.7±0a | 1.6±0a | ND |
| Y44 | MN299250 | Blue | Leaf endosphere | <i>Rhodotorula glutinis</i>                  | ND     | ND        | ND     | ND     | 1.6±0a | ND     | ND |
| Y46 | MN299246 | Blue | Leaf endosphere | <i>Rhodotorula mucilaginosa</i>              | ND     | ND        | ND     | ND     | ND     | ND     | ND |
| Y47 | MN299280 | Blue | Leaf endosphere | <i>Clavispora lusitaniae</i>                 | ND     | ND        | ND     | ND     | ND     | ND     | ND |
| Y48 | MN299298 | Blue | Leaf endosphere | <i>Papiliotrema flavescens</i>               | ND     | ND        | ND     | ND     | ND     | ND     | ND |
| Y50 | MN299251 | Blue | Leaf endosphere | <i>Rhodotorula glutinis</i>                  | ND     | ND        | ND     | ND     | ND     | ND     | ND |
| Y52 | MN299303 | Blue | Leaf endosphere | <i>Naganishia</i> sp.                        | ND     | 15.8±1.8a | ND     | 1.5±0b | ND     | ND     | ND |

|     |          |      |                 |                                |    |    |    |         |        |        |    |
|-----|----------|------|-----------------|--------------------------------|----|----|----|---------|--------|--------|----|
| Y53 | MN299304 | Blue | Leaf endosphere | <i>Naganishia</i> sp.          | ND | ND | ND | 1.25±0a | ND     | ND     | ND |
| Y55 | MN299281 | Blue | Leaf endosphere | <i>Clavispora lusitaniae</i>   | ND | ND | ND | ND      | ND     | ND     | ND |
| Y57 | MN299252 | Blue | Leaf endosphere | <i>Rhodotorula glutinis</i>    | ND | ND | ND | ND      | ND     | 2.4±0b | ND |
| Y58 | MN299253 | Blue | Leaf endosphere | <i>Rhodotorula glutinis</i>    | ND | ND | ND | ND      | 2.6±0b | 1.6±0a | ND |
| Y59 | MN299282 | Blue | Leaf endosphere | <i>Clavispora lusitaniae</i>   | ND | ND | ND | ND      | ND     | ND     | ND |
| Y63 | MN299305 | Blue | Leaf endosphere | <i>Aureobasidium pullulans</i> | ND | ND | ND | ND      | ND     | ND     | ND |
| Y64 | MN299306 | Blue | Leaf endosphere | <i>Aureobasidium pullulans</i> | ND | ND | ND | 1.8±0c  | 3.4±0c | 2.6±0b | ND |
| Y65 | MN299299 | Blue | Leaf endosphere | <i>Papiliotrema flavescens</i> | ND | ND | ND | ND      | 1.0±0a | ND     | ND |
| Y66 | MN299283 | Blue | Leaf endosphere | <i>Clavispora lusitaniae</i>   | ND | ND | ND | ND      | ND     | ND     | ND |
| Y68 | MN299284 | Blue | Leaf endosphere | <i>Clavispora lusitaniae</i>   | ND | ND | ND | ND      | ND     | ND     | ND |
| Y69 | MN299285 | Blue | Phyllosphere    | <i>Clavispora lusitaniae</i>   | ND | ND | ND | ND      | ND     | ND     | ND |
| Y70 | MN299300 | Blue | Phyllosphere    | <i>Papiliotrema flavescens</i> | ND | ND | ND | ND      | ND     | ND     | ND |

|     |          |      |              |                                |    |    |    |    |    |    |    |
|-----|----------|------|--------------|--------------------------------|----|----|----|----|----|----|----|
| Y71 | MN299307 | Blue | Phyllosphere | <i>Papiliotrema flavescens</i> | ND |
| Y74 | MN299286 | Blue | Phyllosphere | <i>Clavispora lusitaniae</i>   | ND |
| Y75 | MN299287 | Blue | Phyllosphere | <i>Clavispora lusitaniae</i>   | ND |
| Y76 | MN299288 | Blue | Phyllosphere | <i>Clavispora lusitaniae</i>   | ND |

\* The mean  $\pm$  standard deviation of 3 experiments is shown. Different lower-case letters between strains indicate statistically significant differences (p-value <0.05) according to ANOVA with Tukey post hoc. ND= Not detected.

<sup>1</sup> Siderophore production was detected in Grimm-Allen cultures and quantified by CAS-Fe solution.

<sup>2</sup> Auxin production was detected in YPD-L-tryptophan cultures and quantified with Salkowski reagent.

<sup>3</sup> Phosphate solubilization was evaluated using Pikovskaya medium with tricalcium phosphate.

<sup>4</sup> Pectinase production was evaluated in minimal medium with pectin and revealed using a 5% CTAB solution.

<sup>5</sup> Cellulase production was evaluated using Congo red medium.

<sup>6</sup> Protease production was evaluated using Skim milk medium.

<sup>7</sup> Amylase production was evaluated in minimal medium with potato starch and revealed using an Iodine solution.
